# Supplementary material for: Pyramidal Decision Support Framework Leverages Subspecialty Expertise across Enterprise to Achieve Superior Cancer Outcomes and Personalized, Precision Care Plans
Source: MDPI journal article supplement (doi:10.3390/jcm11226738), 2022-11-14
Supplement: s1 [file s1]

Supplemental Figures and Tables:

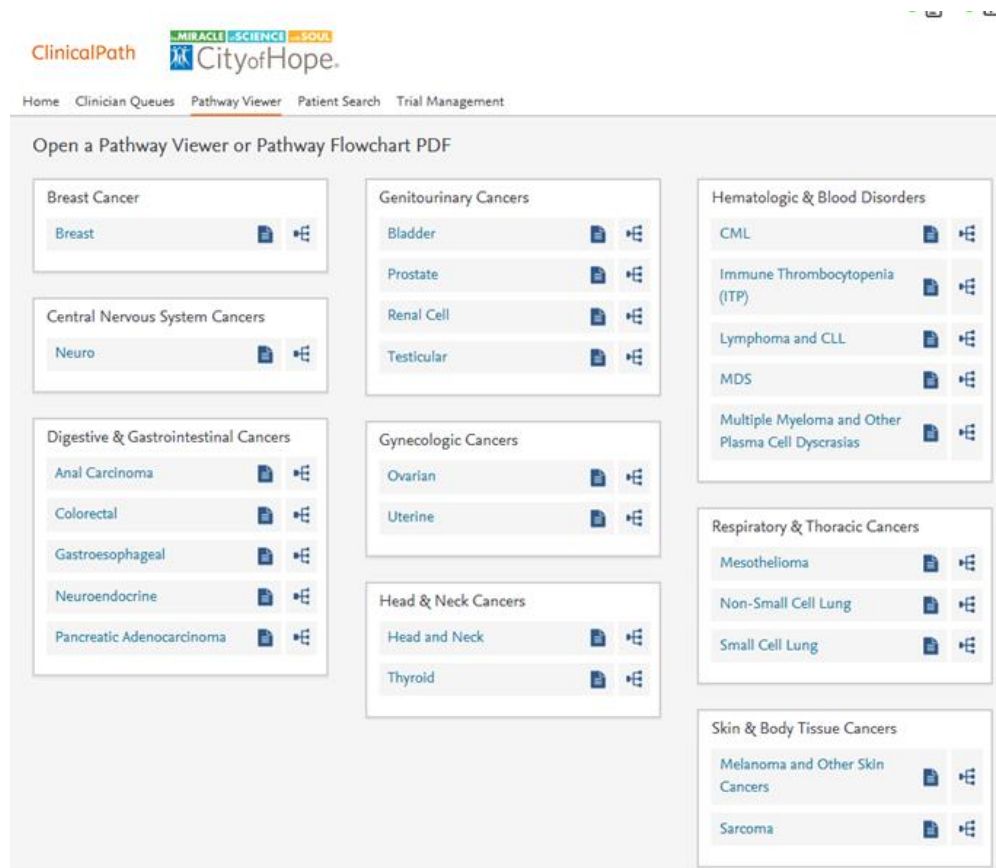

**Figure S1:** Tumor Types by Disease Categories in City of Hope’s ClinPath Pathways.

| Table S1: Tumor Board Quality Improvement Questionnaire |                                   |
|---------------------------------------------------------|-----------------------------------|
| Case Submission                                         |                                   |
| 1                                                       | Date                              |
| 2                                                       | Submitting Provider               |
| 3                                                       | Medical Record Number             |
| 4                                                       | Primary Site                      |
| 5                                                       | Case Description                  |
| 6                                                       | Initial Presentation or Recurrent |
| 7                                                       | Histology                         |
| 8                                                       | TNM Stage                         |
| 9                                                       | Question for Radiology            |
| 10                                                      | Question for Pathology            |
| 11                                                      | Question for Surgery              |
| 12                                                      | Question for Medical Oncology     |
| 13                                                      | Question for Radiation Oncology   |
| 14                                                      | Question for Genetics             |
| 15                                                      | Other Questions                   |
| 16                                                      | Question for Tumor Board          |
| Case Discussion Results                                 |                                   |

|    |                                     |
|----|-------------------------------------|
| 1  | Tumor Board Date                    |
| 2  | Medical Record Number               |
| 3  | Radiology Recommendations           |
| 4  | Pathology Recommendations           |
| 5  | Surgery Recommendations             |
| 6  | Medical Oncology Recommendations    |
| 7  | Radiation Oncology Recommendations  |
| 8  | Genetics Recommendations            |
| 9  | Other Recommendations               |
| 10 | Overall Tumor Board Recommendations |
